# Supplementary material for: Directed synthesis of SnO2@BiVO4/Co-Pi photoanode for highly efficient photoelectrochemical water splitting and urea oxidation
Source: Royal Society of Chemistry journal article supplement (doi:10.1039/c8ta11573g), 2019-01-01
Supplement: c8ta11573g1.pdf [file c8ta11573g1.pdf]

**Supplementary Information for**

**Directed Synthesis of SnO<sub>2</sub>@BiVO<sub>4</sub>/Co-Pi Photoanode for Highly Efficient  
Photoelectrochemical Water Splitting and Urea Oxidation**

Jingchao Liu <sup>a</sup>, Jianming Li <sup>b</sup>, Mingfei Shao\*<sup>a</sup> and Min Wei <sup>a</sup>

<sup>a</sup> *State Key Laboratory of Chemical Resource Engineering, Beijing University of Chemical  
Technology, Beijing 100029, China*

<sup>b</sup> *Petroleum Geology Research and Laboratory Center, Research Institute of Petroleum Exploration  
& Development (RIPED), PetroChina, Beijing 100083, China*

*\*Corresponding author. E-mail: shaomf@mail.buct.edu.cn*

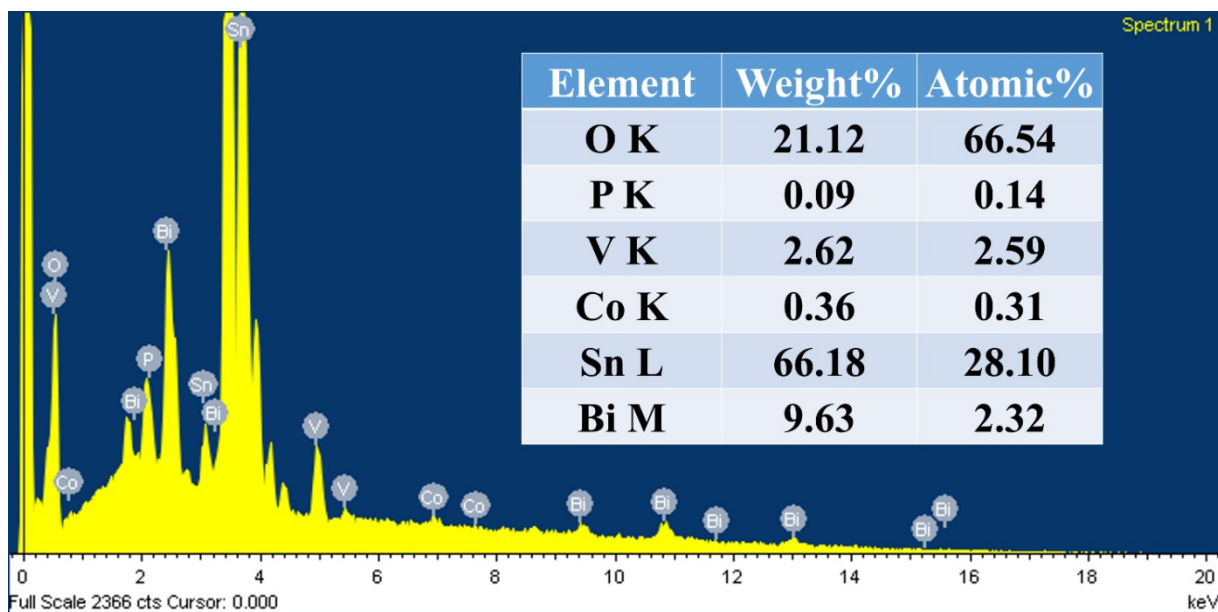

**Fig. S1** EDX spectra and corresponding elemental contents of SnO<sub>2</sub>@BiVO<sub>4</sub>/Co-Pi NRAs.

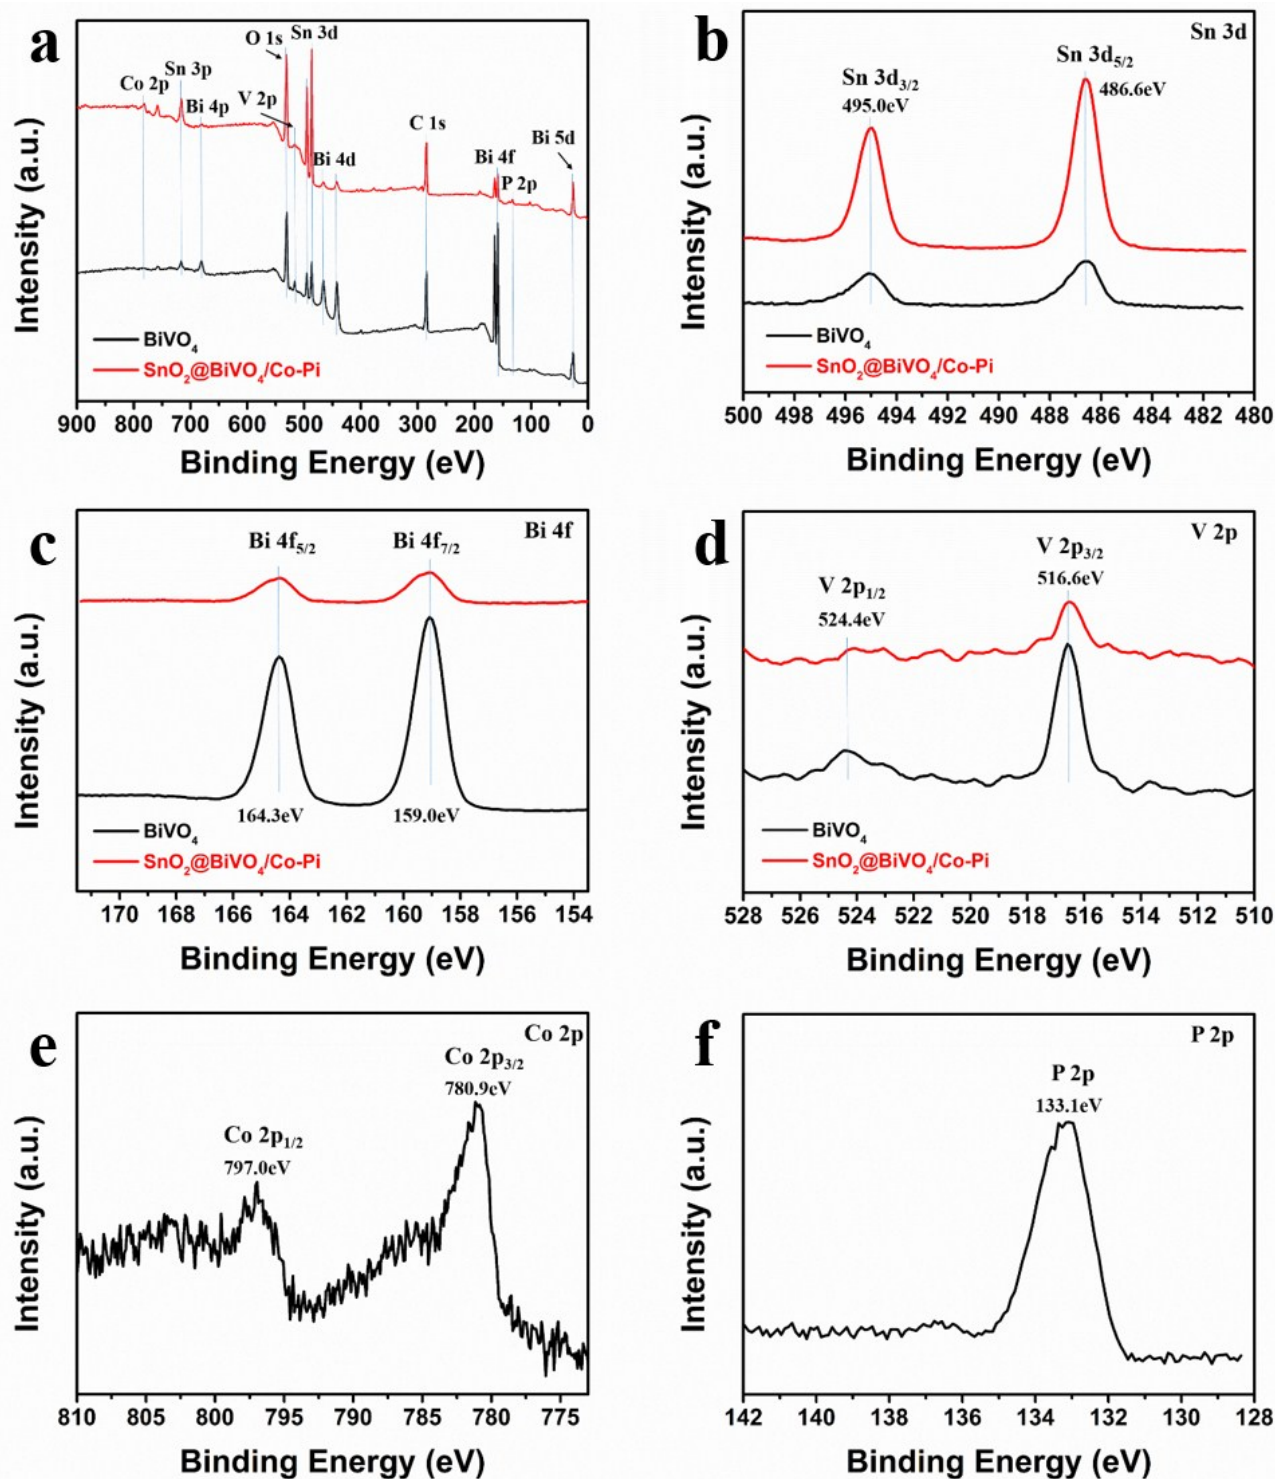

**Fig. S2** XPS spectra of  $\text{BiVO}_4$  and  $\text{SnO}_2@/\text{BiVO}_4/\text{Co-Pi}$  photoanode: the survey spectrum (a) and high resolution XPS spectrum of Sn 3d (b), Bi 4f (c), V 2p (d). XPS spectra of  $\text{SnO}_2@/\text{BiVO}_4/\text{Co-Pi}$  Photoanode: Co 2p (e) and P 2p (f).

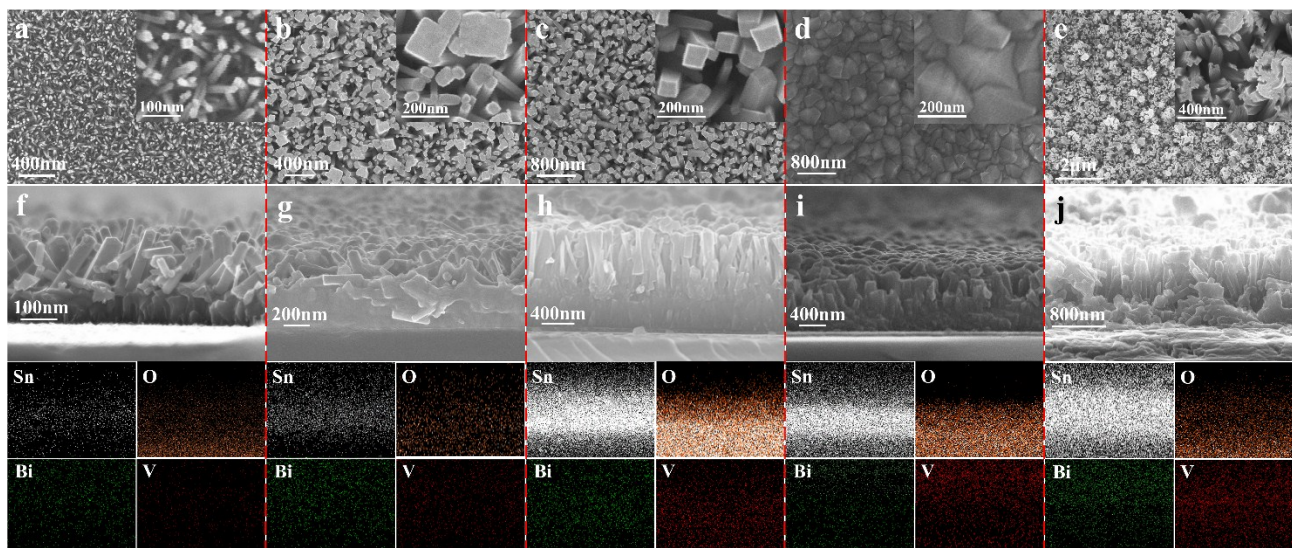

**Fig. S3** Top-view SEM images of (a) 25-SnO<sub>2</sub>, (b) 50-SnO<sub>2</sub>, (c) 100-SnO<sub>2</sub>, (d) 100\*-SnO<sub>2</sub> and (e) 150-SnO<sub>2</sub>, respectively. Cross-sectional SEM images and EDX mappings of (f) 25-SnO<sub>2</sub>@BiVO<sub>4</sub>, (g) 50-SnO<sub>2</sub>@BiVO<sub>4</sub>, (h) 100-SnO<sub>2</sub>@BiVO<sub>4</sub>, (i) 100\*-SnO<sub>2</sub>@BiVO<sub>4</sub> and (j) 150-SnO<sub>2</sub>@BiVO<sub>4</sub>, respectively.

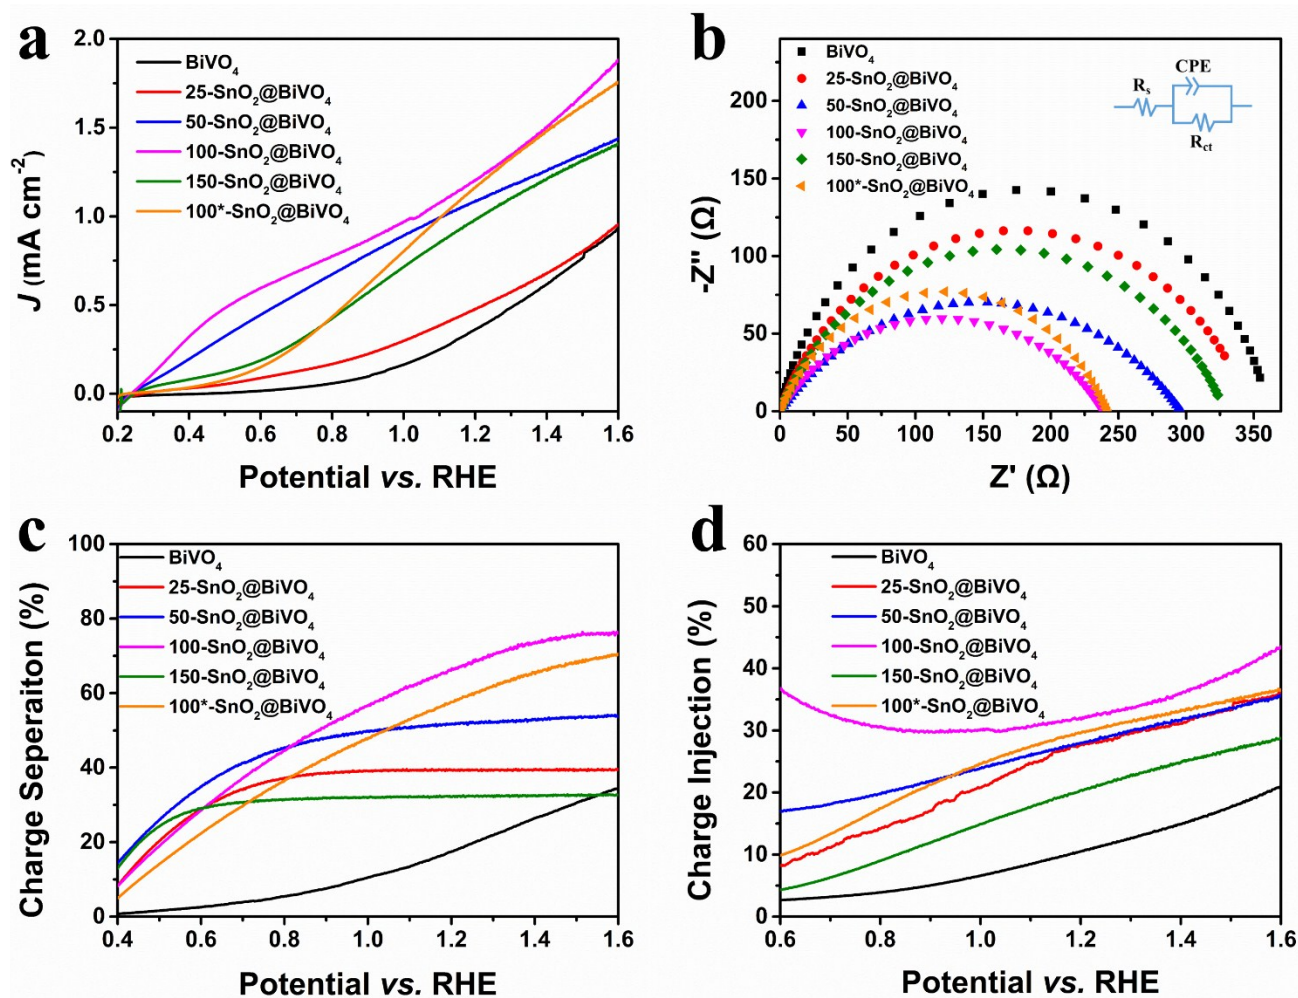

**Fig. S4** (a) Current–potential curves of the photoanodes under AM 1.5 G illumination in 0.1M PBS. (b) EIS measured at 1.23 V vs. RHE under illumination. Inset: Corresponding equivalent circuit.  $R_{ct}$  is the charge-transfer resistance across the electrode/electrolyte interface,  $R_s$  is the solution resistance, and CPE is the constant phase component. (c) Charge separation efficiency and (d) Charge injection efficiency vs. potential curves for the samples of BiVO<sub>4</sub>, 25-SnO<sub>2</sub>@BiVO<sub>4</sub>, 50-SnO<sub>2</sub>@BiVO<sub>4</sub>, 100-SnO<sub>2</sub>@BiVO<sub>4</sub>, 150-SnO<sub>2</sub>@BiVO<sub>4</sub> and 100\*-SnO<sub>2</sub>@BiVO<sub>4</sub>, respectively.

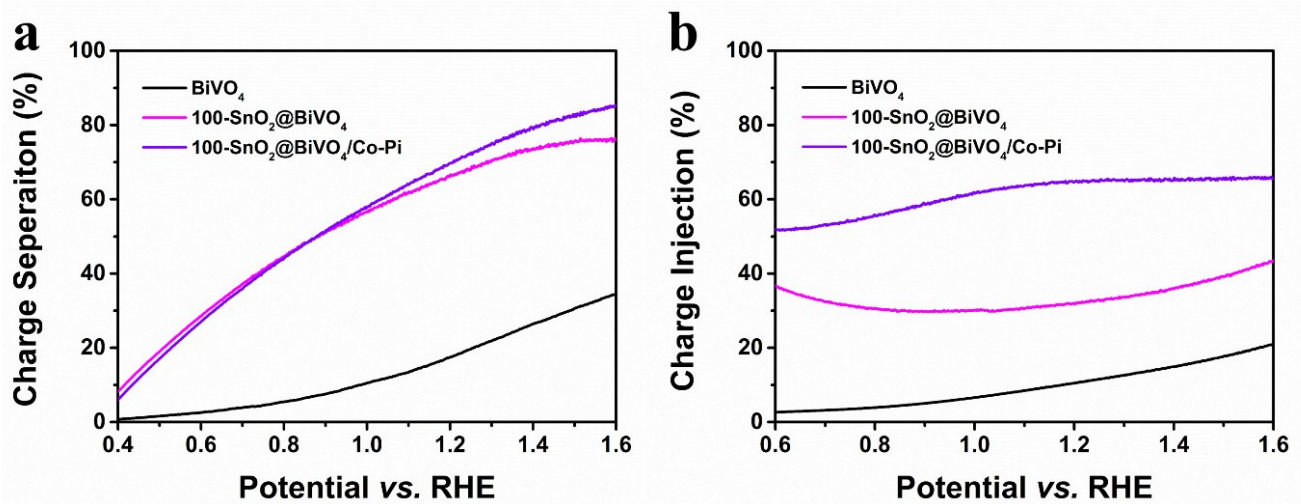

**Fig. S5** (a) Charge separation efficiency and (b) Charge injection efficiency vs. potential curves for the samples of  $\text{BiVO}_4$ ,  $100\text{-SnO}_2\text{@BiVO}_4$  and  $100\text{-SnO}_2\text{@BiVO}_4/\text{Co-Pi}$ , respectively.

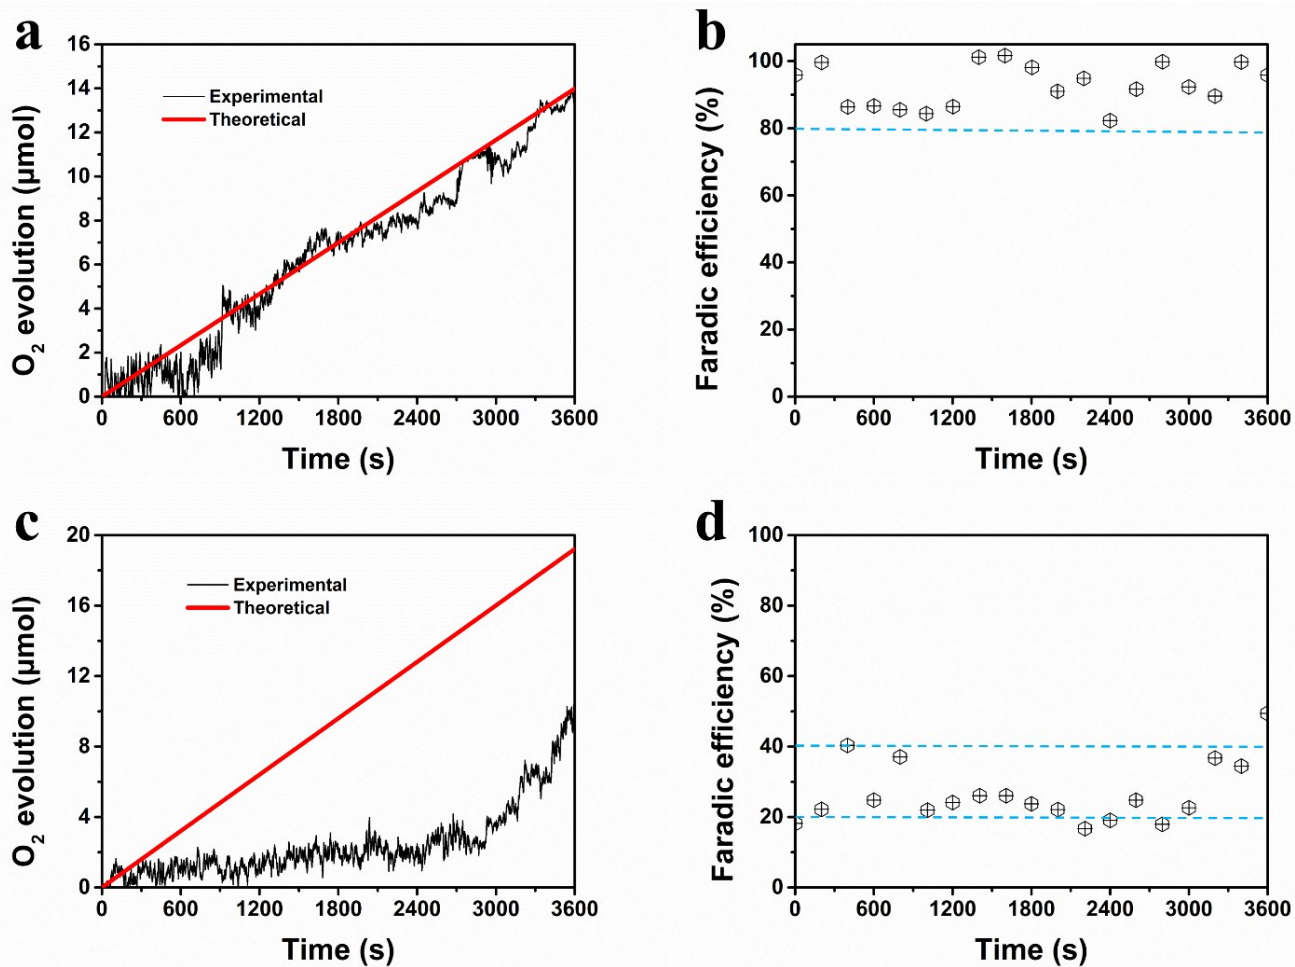

**Fig. S6** (a) O<sub>2</sub> evolution (black curve) on SnO<sub>2</sub>@BiVO<sub>4</sub>/Co-Pi photoanode at bias of 1.23 V vs. RHE. Red line is the theoretical result based on the number of transferred electrons. (b) Faradaic efficiency of the triadic photoanode for water oxidation. Symbols represent the data calculated from the experimental results. Solution, 0.1 M PBS (pH 7); scan rate, 20 mV s<sup>-1</sup>; and AM1.5G (intensity: 100 mW cm<sup>-2</sup>), back-side illumination. (c) and (d) are obtained in 0.1M PBS + 2% urea.

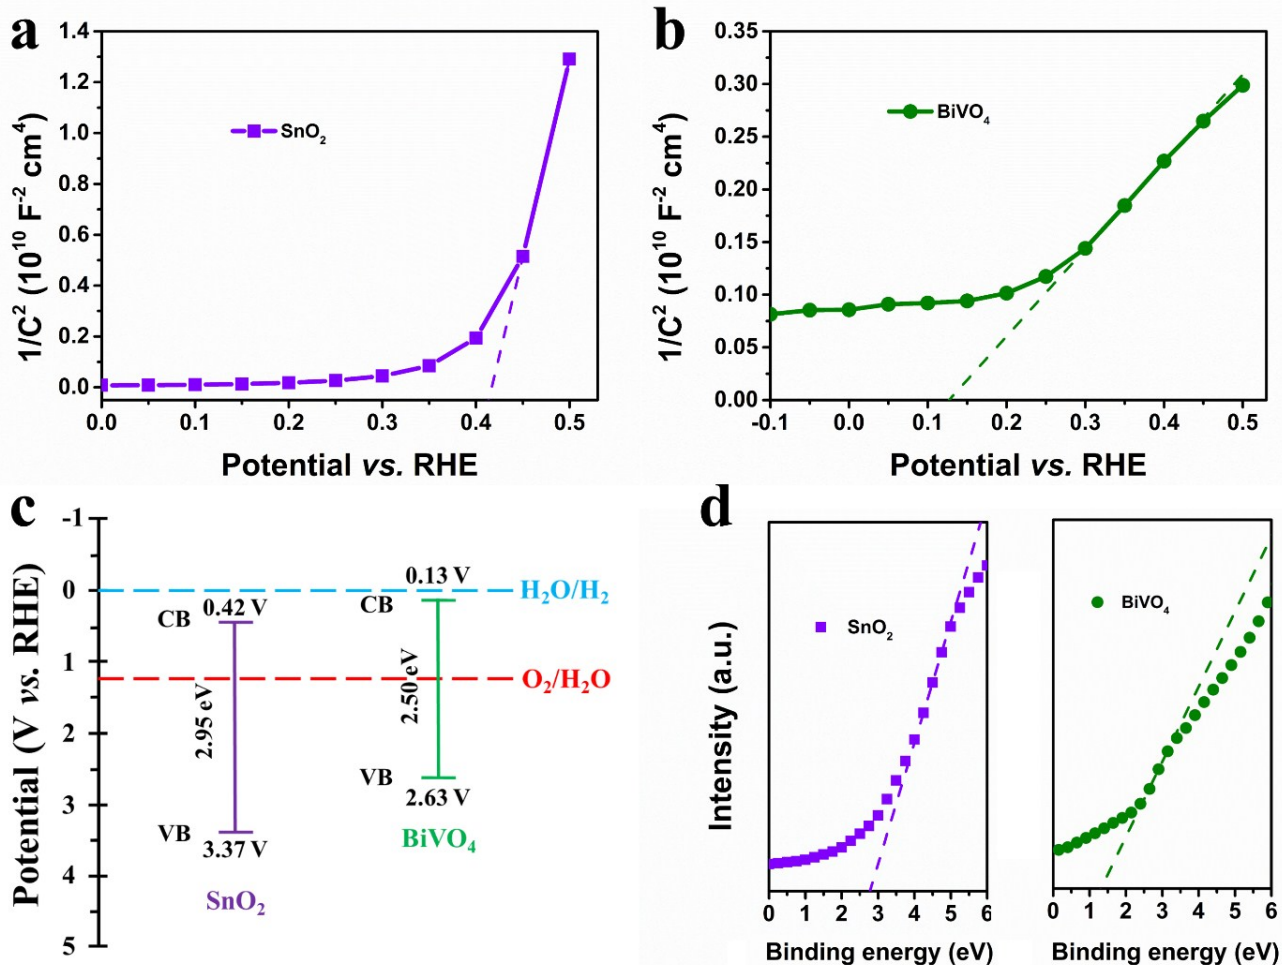

**Fig. S7** Mott-Schottky curves of (a)  $\text{SnO}_2$  and (b)  $\text{BiVO}_4$ . (c) Schematic illustration of the band alignment of  $\text{SnO}_2$  and  $\text{BiVO}_4$ . (d) The ultraviolet photoelectron spectroscopy (UPS) for determining the valence band edge positions of  $\text{SnO}_2$  and  $\text{BiVO}_4$ .



**Table S1.** Summary of recent key advances in BiVO<sub>4</sub>-based photoanodes for PEC water splitting under AM 1.5G illumination.

| Photoanode materials                                 | Electrolyte                                                                          | Photocurrent density (1.23 V vs. RHE) | Efficiency (IPCE value at 400 nm) | Stability     | Ref       |
|------------------------------------------------------|--------------------------------------------------------------------------------------|---------------------------------------|-----------------------------------|---------------|-----------|
| Mo:BiVO <sub>4</sub> /SnO <sub>2</sub> /Si           | 0.5 M PBS (pH 7)                                                                     | 2.91                                  | 35%                               | ~75% (30h)    | 1         |
| BiVO <sub>4</sub> /WO <sub>3</sub> /SnO <sub>2</sub> | 0.5 M Na <sub>2</sub> SO <sub>4</sub> + 0.1 M NaPi (pH 7)                            | 1.50                                  | 30%                               | Not given     | 2         |
| Sb:SnO <sub>2</sub> /BiVO <sub>4</sub> NRAs          | 0.5 M PBS (pH 7)                                                                     | 1.70                                  | Not given                         | ~95% (1800s)  | 3         |
| SnO <sub>2</sub> /BiVO <sub>4</sub>                  | 0.5 M Na <sub>2</sub> SO <sub>4</sub> + 0.1 M KPi (pH 7)                             | 0.95                                  | Not given                         | Not given     | 4         |
| BiVO <sub>4</sub> /SnO <sub>2</sub>                  | 0.2 M sodium borate (pH 9)                                                           | 0.60                                  | 13.47%                            | ~95% (300s)   | 5         |
| BiVO <sub>4</sub> /SnO <sub>2</sub> /WO <sub>3</sub> | 0.5 M PBS (pH 7)                                                                     | 2.38                                  | 40%                               | 88.6% (900s)  | 6         |
| SnO <sub>2</sub> /BiVO <sub>4</sub>                  | 0.5 M Na <sub>2</sub> SO <sub>4</sub> + 0.1 M NaPi (pH 7)                            | 1.60                                  | 30%                               | ~60% (1000s)  | 7         |
| BiVO <sub>4</sub> /SnO <sub>2</sub>                  | 0.3 M Na <sub>2</sub> SO <sub>4</sub> + KPi (pH 7.5)                                 | 0.60                                  | 15%                               | Not given     | 8         |
| C-QDs/BiVO <sub>4</sub> /SnO <sub>2</sub>            | 0.5 M Na <sub>2</sub> SO <sub>4</sub> (pH 6.6)                                       | 2.20                                  | 10%                               | ~75% (3600s)  | 9         |
| Fe/NiOOH-Mo:BiVO <sub>4</sub> /WO <sub>3</sub>       | 0.5 M Na <sub>2</sub> SO <sub>4</sub> + 0.1 M Na <sub>2</sub> SO <sub>3</sub> (pH 7) | 5.79 ( <i>J</i> <sub>sulfite</sub> )  | 80% (sulfite)                     | 97% (7200s)   | 10        |
| Oxygen Vacancies-BiVO <sub>4</sub> /CoPi             | 0.5 M KPi (pH 7)                                                                     | 3.42                                  | Not given                         | ~90% (10h)    | 11        |
| WO <sub>3</sub> /BiVO <sub>4</sub>                   | 0.5 M KPi (pH 7.2)                                                                   | 1.35                                  | 35%                               | Not given     | 12        |
| Ni <sub>4</sub> O <sub>4</sub> /BiVO <sub>4</sub>    | 0.2 M PBS (pH 7)                                                                     | 3.9                                   | 75%                               | ~60% (1800s)  | 13        |
| W-Doped BiVO <sub>4</sub> /Co-Pi                     | 0.1 M PBS (pH 7)                                                                     | 4.0                                   | Not given                         | ~95% (3600s)  | 14        |
| Mo-Doped BiVO <sub>4</sub> /Fe(Ni)OOH                | 0.5 M PBS (pH 7)                                                                     | 6.0                                   | 90%                               | ~100% (6h)    | 15        |
| SnO <sub>2</sub> @BiVO <sub>4</sub> /Co-Pi           | 0.1 M PBS (pH 7)                                                                     | 2.63                                  | 47.4%                             | 90.2% (3600s) | This work |

\* *J*<sub>sulfite</sub> means photocurrent for sulfite oxidation.

**Table S2.** Summary of electrochemical and PEC oxidation of urea in recent three years.

| Electrode materials                                                               | Electrolyte              | Onset oxidation potential                       | Year      | Ref |
|-----------------------------------------------------------------------------------|--------------------------|-------------------------------------------------|-----------|-----|
| Ni catalyst                                                                       | 0.1 M urea + 1.0 M KOH   | 0.35 V vs. Ag/AgCl                              | 2016      | 16  |
| Ni nanowire arrays                                                                | 1.0 M urea + 6.0 M KOH   | -0.2 V vs. Ag/AgCl                              | 2016      | 17  |
| Nickel Manganese Oxide                                                            | 0.33 M urea + 1.0 M KOH  | 0.29 V vs. Ag/AgCl                              | 2016      | 18  |
| Ni(OH) <sub>2</sub> nanosheets                                                    | 0.33 M urea + 1.0 M KOH  | 0.34 V vs. Ag/AgCl                              | 2016      | 19  |
| 2D ultrathin MnO <sub>2</sub>                                                     | 0.5 M urea + 1.0 M KOH   | 0.32 V vs. Ag/AgCl                              | 2016      | 20  |
| Nickel phosphates                                                                 | 0.1 M urea + 1.0 M KOH   | 0.33 V vs. Ag/AgCl                              | 2017      | 21  |
| Se-Ni(OH) <sub>2</sub> @NiSe                                                      | 0.33 M urea + 1.0 M KOH  | 0.30 V vs. SCE                                  | 2017      | 22  |
| Ni-Mo/graphene nanocatalysts                                                      | 0.33 M urea + 1.0 M KOH  | 0.36 V vs. Ag/AgCl                              | 2017      | 23  |
| 2D Ni-MOF                                                                         | 0.33 M urea + 1.0 M KOH  | 1.36 V vs. RHE                                  | 2017      | 24  |
| MnO <sub>2</sub> /MnCo <sub>2</sub> O <sub>4</sub> /Ni core-shell heterostructure | 0.5 M urea + 1.0 M KOH   | 1.33 V vs. RHE                                  | 2017      | 25  |
| $\beta$ Ni(OH) <sub>2</sub>                                                       | 0.33 M urea + 1.0 M KOH  | 1.36 V vs. RHE                                  | 2018      | 26  |
| Ni-WC/C catalyst                                                                  | 0.33 M urea + 1.0 M KOH  | 0.40 V vs. Hg/HgO                               | 2018      | 27  |
| Ni <sub>2</sub> P@Ni foam                                                         | 0.6 M urea + 5.0 M KOH   | 0.24 V vs. Ag/AgCl                              | 2018      | 28  |
| NiCo <sub>2</sub> O <sub>4</sub>                                                  | 0.33 M urea + 1.0 M KOH  | 0.38 V vs. Hg/HgO                               | 2018      | 29  |
| NiMoO <sub>4</sub> nanosheets                                                     | 0.5 M urea + 1.0 M KOH   | 0.34 V vs. Ag/AgCl                              | 2018      | 30  |
| $\alpha$ -Ni(OH) <sub>2</sub> nanosheets                                          | 0.33 M urea + 1.0 M KOH  | 0.35 V vs. Ag/AgCl                              | 2018      | 31  |
| Ni-TiO <sub>2</sub>                                                               | 0.33 M urea + 1.0 M NaOH | 1.37 V vs. RHE (dark)<br>0.10 V vs. RHE (light) | 2012      | 32  |
| Ni(OH) <sub>2</sub> /Ti-Fe <sub>2</sub> O <sub>3</sub>                            | 0.1 M urea + 1.0 M KOH   | Not given (dark)<br>0.50 V vs. RHE (light)      | 2015      | 33  |
| SnO <sub>2</sub> @BiVO <sub>4</sub> /Co-Pi                                        | 0.33 M urea + 0.1 M PBS  | 1.60 V vs. RHE (dark)<br>0.20 V vs. RHE (light) | This work |     |

## References:

- (1) L. Zhang, X. Ye, M. Bloor, A. Poletayev, N. A. Melosh and W. C. Chueh, *Energy Environ. Sci.*, 2016, **9**, 2044 – 2052.
- (2) S. M. López, C. Fàbrega, D. M. Satoca, M. D. H. Alonso, G. P. Pérez, A. Morata, J. R. Morante and T. Andreu, *ACS Appl. Mater. Interfaces* 2016, **8**, 4076 – 4085.
- (3) L. Zhou, C. Zhao, B. Giri, P. Allen, X. Xu, H. Joshi, Y. Fan, L. V. Titova and P. M. Rao, *Nano Lett.* 2016, **16**, 3463 – 3474.
- (4) S. Byun, B. Kim, S. Jeon and B. Shin, *J. Mater. Chem. A*, 2017, **5**, 6905 – 6913.
- (5) M. Xie, Z. Zhang, W. Han, X. Cheng, X. Li and E. Xie, *J. Mater. Chem. A*, 2017, **5**, 10338 – 10346.
- (6) J. H. Baek, B. J Kim, G. S. Han, S. W. Hwang, D. R. Kim, I. S. Cho and H. S. Jung, *ACS Appl. Mater. Interfaces* 2017, **9**, 1479 – 1487.
- (7) S. S. M. Bhat, J. M. Suh, S. Choi, S. Hong, Sol A. Lee, C. Kim, C. W. Moon, M. G. Lee and H. W. Jang, *J. Mater. Chem. A*, 2018, **6**, 14633 – 14643.
- (8) S. Chen, J. Yang and J. Wu, *ACS Appl. Energy Mater.* 2018, **1**, 2143 – 2149.
- (9) Z. Zhang, X. Jiang, J. Mei, Y. Li, W. Han, M. Xie, F. Wang and E. Xie, *Chem. Eng.J.* 2018, **331**, 48 – 53.
- (10) K. Kim, S. K. Nam, J. H. Park and J. H. Moon, *J. Mater. Chem. A* 2019, DOI: 10.1039/c8ta09886g.
- (11) S. Byun, G. Jung, Y. Shi, M. Lanza and B. Shin, *Adv. Funct. Mater.* 2019, 1806662. DOI: 10.1002/adfm.201806662.
- (12) Y. Liu, B. R. Wygant, K. Kawashima, O. Mabayoje, T. E. Hong, S. Lee, J. Lin, J. Kim, K. Yubuta, W. Li, J. Li and C. B. Mullins, *Appl. Catal. B- Environ.* 2019, **245**, 227 – 239.
- (13) B. Gao, T. Wang, X. Fan, H. Gong, P. Li, Y Feng, X Huang, J He and J. Ye, *J. Mater. Chem. A*, 2019, **7**, 278–288.
- (14) L. Han, F. F. Abdi, R. van de Krol, R. Liu, Z. Huang, H.-J. Lewerenz, B. Dam, M. Zeman and A. H. M. Smets, *ChemSusChem*, 2014, **7**, 2832 – 2838.
- (15) S. Xiao, C. Hu, H. Lin, X. Meng, Y. Bai, T. Zhang, Y. Yang, Y. Qu, K. Yan, J. Xu, Y. Qiu and S. Yang, *J. Mater. Chem. A*, 2017, **5**, 19091 – 19097.
- (16) F. Guo, K. Ye, M. Du, X. Huang, K. Cheng, G. Wang and D. Cao, *Electrochim. Acta.* 2016, **210**,

474 – 482.

- (17) F. Guo, K. Ye, M. Du, K. Cheng, Y. Cao, G. Wang and D. Cao, *Electrochim. Acta.* 2016, **190**, 150 – 158.
- (18) S. Periyasamy, P. Subramanian, E. Levi, D. Aurbach, A. Gedanken and A. Schechter, *ACS Appl. Mater. Interfaces* 2016, **8**, 12176 –12185.
- (19) X. Zhu, X. Dou, J. Dai, X. An, Y. Guo, L. Zhang, S. Tao, J. Zhao, W. Chu, X. Zeng, C. Wu, and Y Xie, *Angew. Chem.* 2016, **128**, 12653 –12657.
- (20) S. Chen, J. Duan, A. Vasileff and S. Qiao, *Angew. Chem. Int. Ed.* 2016, **55**, 3804 –3808.
- (21) X. Song, L. Gao, Y. Li, W. Chen, L. Mao and J. Yang, *Electrochim. Acta.* 2017, **251**, 284 – 292.
- (22) C. Tang, Z. Zhao, J. Chen, B. Li, L. Chen and C. Li, *Electrochim. Acta.* 2017, **248**, 243 – 249.
- (23) W. Shi, R. Ding, X. Li, Q. Xu and E. Liu, *Electrochim. Acta.* 2017, **242**, 247 – 259.
- (24) D. Zhu, C. Guo, J. Liu, L. Wang, Y. Du and S. Qiao, *Chem. Commun.*, 2017, **53**, 10906 – 10909.
- (25) C. Xiao, S. Li, X. Zhang and D. R. MacFarlane, *J. Mater. Chem. A*, 2017, **5**, 7825–7832.
- (26) R. K. Singh and A. Schechter, *Electrochim. Acta.* 2018, **278**, 405 – 411.
- (27) L. Wang, S. Zhu, N. Marinkovic, S. Kattel, M. Shao, B. Yang and J. G. Chen, *Appl. Catal. B- Environ.* 2018, **232**, 365 – 370.
- (28) G. Wang, K. Ye, J. Shao, Y. Zhang, K. Zhu, K. Cheng, J. Yan, G. Wang and D. Cao, *Int. J. Hydrogen Energy*, 2018, **43**, 9316 – 9325.
- (29) A. Schranck, R. Marks, E. Yates and K. Doudrick, *Environ. Sci. Technol.* 2018, **52**, 8638 – 8648.
- (30) Y. Tong, P. Chen, M. Zhang, T. Zhou, L. Zhang, W. Chu, C. Wu, and Y. Xie, *ACS Catal.* 2018, **8**, 1 – 7.
- (31) C. Lin, Z. Gao, F. Zhang, J. Yang, B. Liu and J. Jin, *J. Mater. Chem. A*, 2018, **6**, 13867 – 13873.
- (32) G. Wang, Y. Ling, X. Lu, H. Wang, F. Qian, Y. Tong and Yat Li, *Energy Environ. Sci.*, 2012, **5**, 8215 – 8219.
- (33) D. Xu, Z. Fu, D. Wang, Y. Lin, Y. Sun, D. Meng and T. Xie, *Phys. Chem. Chem. Phys.*, 2015, **17**, 23924 – 23930.
